# Supplementary material for: Association between plasma immunoproteasome and 90-day prognosis after first-ever ischemic stroke
Source: PubMed Central journal article supplement — Neural Regen Res. 2020 Oct 9;16(4):790–5. doi: 10.4103/1673-5374.295344 (PMC8067934; doi:10.4103/1673-5374.295344), 2020-10-09
Supplement: NRR-16-790_Suppl1.pdf [file NRR-16-790_Suppl1.pdf]

# 福建省立医院伦理委员会

## 临床科研试验审批件

伦审科研第 (K2014-01-003) 号

|                                                                                                     |                                                                                                                                                                                                                                                                                                                                                                           |                                                                                                                                                                                                             |           |                 |
|-----------------------------------------------------------------------------------------------------|---------------------------------------------------------------------------------------------------------------------------------------------------------------------------------------------------------------------------------------------------------------------------------------------------------------------------------------------------------------------------|-------------------------------------------------------------------------------------------------------------------------------------------------------------------------------------------------------------|-----------|-----------------|
| 审<br>评<br>项<br>目                                                                                    | 项 目 名 称                                                                                                                                                                                                                                                                                                                                                                   | 血免疫蛋白酶体与首发急性缺血性脑卒中 90 天预后相关性                                                                                                                                                                                |           |                 |
|                                                                                                     | 课 题 来 源                                                                                                                                                                                                                                                                                                                                                                   | 国际合作课题 <input type="checkbox"/> 国家级科研课题 <input type="checkbox"/> 省级科研课题 <input type="checkbox"/><br>福州市科研课题 <input type="checkbox"/> 医院科研课题 <input type="checkbox"/> 其他 <input checked="" type="checkbox"/> |           |                 |
|                                                                                                     | 课 题 编 号                                                                                                                                                                                                                                                                                                                                                                   | /                                                                                                                                                                                                           | 起 止 时 间   | 2014.03-2014.09 |
|                                                                                                     | 科 室                                                                                                                                                                                                                                                                                                                                                                       | 神经内科                                                                                                                                                                                                        | 课 题 负 责 人 | 陈兴泳             |
|                                                                                                     | 职 称                                                                                                                                                                                                                                                                                                                                                                       | 副主任医师                                                                                                                                                                                                       | 联 系 电 话   | 13405965663     |
| 受<br>理<br>审<br>查<br>文<br>件                                                                          | <input checked="" type="checkbox"/> 1.临床研究方案<br><input checked="" type="checkbox"/> 2.知情同意书<br><input checked="" type="checkbox"/> 3.伦理审查申请                                                                                                                                                                                                                               |                                                                                                                                                                                                             |           |                 |
| 审查方式                                                                                                |                                                                                                                                                                                                                                                                                                                                                                           | 快速审查                                                                                                                                                                                                        |           |                 |
| 结<br>论                                                                                              | <p>根据卫生部《涉及人的生物医学研究伦理审查办法（试行）》（2007）、食品药品监督管理局《药物临床试验质量管理规范》（2003）、《医疗器械临床试验规定》（2004）、世界医学会《赫尔辛基宣言》（2013）、以及国际医学科学组织委员会《人体生物医学研究国际伦理指南》（2002）的伦理原则，经本伦理委员会审查，同意按临床研究方案进行临床研究。</p> <p>该研究进行过程中是否接受伦理委员会的持续审查 <input checked="" type="checkbox"/>是 <input type="checkbox"/>否</p> <p>审查频度为研究批准之日起 <input type="checkbox"/>6 个月 <input checked="" type="checkbox"/> 12 个月</p> |                                                                                                                                                                                                             |           |                 |
| 伦理委员会（盖章）：<br> |                                                                                                                                                                                                                                                                                                                                                                           |                                                                                                                                                                                                             |           |                 |

地址：福州市东街 134 号 邮编：350001 电话：0591-88216141

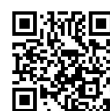

扫描全能王 创建
